# Supplementary material
Source: PubMed Central journal article supplement (PMC7973301)

**Supporting information for**

**Site-specific N-glycosylation Characterization of Recombinant SARS-CoV-2**

**Spike Proteins**

Yong Zhang<sup>1,2†</sup>, Wanjun Zhao<sup>3†</sup>, Yonghong Mao<sup>4</sup>, Yaohui Chen<sup>4</sup>, Shisheng Wang<sup>1,2</sup>, Yi Zhong<sup>1</sup>, Tao Su<sup>1</sup>, Meng Gong<sup>1,2</sup>, Dan Du<sup>1</sup>, Xiaofeng Lu<sup>1,2</sup>, Jingqiu Cheng<sup>1,2\*</sup>, Hao Yang<sup>1,2\*</sup>

<sup>1</sup>Key Laboratory of Transplant Engineering and Immunology, MOH; Institutes for Systems Genetics; Frontiers Science Center for Disease-related Molecular Network, West China Hospital, Sichuan University, Chengdu 610041, China.

<sup>2</sup>Regenerative Medical Research Center, West China Hospital, Sichuan University, Chengdu 610041, China.

<sup>3</sup>Department of Thyroid Surgery, West China Hospital, Sichuan University, Chengdu 610041, China.

<sup>4</sup>Department of Thoracic Surgery, West China Hospital, Sichuan University, Chengdu 610041, China.

†These authors contributed equally to this work.

**Running title:** N-glycosylation of SARS-CoV-2 Spike Protein

**\*Corresponding Authors:** Hao Yang, PhD, Associate Researcher, Key Lab of Transplant Engineering and Immunology, West China Hospital, Sichuan University

Jingqiu Cheng, PhD, Professor, Key Lab of Transplant Engineering and Immunology, West China Hospital, Sichuan University

**Address:** No. 1, Keyuan 4th Road, Gaopeng Avenue, Hi-tech Zone, Chengdu 610041, China.  
Phone: +86-28-85164031; Fax: +86-28-85164031; E-mail: yanghao@scu.edu.cn

## **Supplementary Figures and Tables**

**Supplementary Figure S1.** The theoretical of intact N-glycopeptides of S protein derived from the digestion using trypsin (A) or Glu-C (B) alone or in combination (C). Red letter: N-glycosites; Green letter: trypsin cutting sites; Blue letter: Glu-C cutting sites; Underline: theoretical N-glycopeptides without missing cleavage sites.

**Supplementary Figure S2.** The spectrum of intact N-glycopeptides with the ambiguously assigned N-glycosite (N1134).

**Supplementary Figure S3.** Comparison of the spectra of the intact N-glycopeptide (N149) before (A) and after (B) enrichment.

**Supplementary Figure S4.** Comparison of the spectra of intact N-glycopeptides (N709 and N717) after trypsin digestion (A) and Glu-C digestion (B).

**Supplementary Figure S5.** Comparison of the spectra of intact N-glycopeptides (N709 and N717) (A) and deglycopeptides (B).

**Supplementary Figure S6.** Comparison of the N-glycosites on the SARS-CoV-2 and SARS-CoV spike proteins.

**Supplementary Figure S7.** Representative and high-quality spectra of intact N-glycopeptides and deglycosylated peptides.

**Supplementary Figure S8.** Quantitative analysis of site-specific N-glycosylation of S protein expressed in insect cells (top 5 N-glycans).

**Supplementary Figure S9.** Quantitative analysis of site-specific N-glycosylation of S protein expressed in human cells (top 5 N-glycans).

**Supplementary Figure S10.** Microheterogeneity and macroheterogeneity of the N-linked glycopeptides of the S protein.

**Supplementary Figure S11.** SDS-PAGE analysis of RBDs expressed in insect and human cells.

**Table S1.** Glycoproteomic identification of the N-glycosites on recombinant SARS-CoV-2 S protein expressed in insect cells.

**Table S2.** Glycoproteomic identification of the N-glycosites on recombinant SARS-CoV-2 S protein expressed in human cells.

**Table S3.** Site-specific N-glycosylation characterization of recombinant SARS-CoV-2 spike protein expressed in insect cells.

**Table S4.** Site-specific N-glycosylation characterization of recombinant SARS-CoV-2 spike protein expressed in human cells.

**Table S5.** Mutation frequency of SARS-CoV-2 spike protein.

**Table S6.** Intact N-glycopeptides of the recombinant RBD of the SARS-CoV-2 spike protein.

**Table S7.** A summary of N-glycans on SARS-CoV-2 spike protein expressed in insect and human cells

**Table S8.** A detailed comparison of spike protein N-glycosylation among different studies

**Table S9.** Quantitative analysis of recombinant SARS-CoV-2 spike proteins

**Supplementary Figure S1.** The theoretical of intact N-glycopeptides of S protein derived from the digestion using trypsin (A) or Glu-C (B) alone or in combination (C). Red letter: N-glycosites; Green letter: trypsin cutting sites; Blue letter: Glu-C cutting sites; Underline: theoretical N-glycopeptides without missing cleavage sites.

**A**

Theoretical N-glycopeptides of S protein digested using trypsin

VNLTTRTQLPPAYTNSFTRGVVYYPDKVFRSSVLHSTQDLFLPFFSNVTFWHAIHVS~~GT~~NGTKRFDNPVLPFNDGVYFASTEKSNIIIRGWIFGTTL  
 DSKTQSL~~LIVN~~NATNVVIKVC~~E~~FQFCNDPFLGVYYHKNNKSWMESEFRVYSSANNCTFEYVSQPFLMDLE~~G~~KQGNFKNLREFVFKNIDGYFKI  
 YSKHTPINLVRDLPPQGFSAL~~E~~PLVDLPIGINITRFQTLALHRSYLT~~P~~GDSSSGWTAGAAAYVGYLQPRTFLLKYNE~~NG~~TITDAVDCALDPLSE~~T~~  
 KCTLKSFTVEKGIYQTSNFRVQPTESIVRFPNITNLCPFGEVFNATRFASVYAWNRKRISNCVADYSVLYNSASFSTFKCYGVSPTKLN~~DL~~CFTN  
 VYADSFVIRGDEV~~R~~QIAPGQTGKIADYNYKLPDDFTGCVIAWNSN~~LD~~SKVGGNYNYLYR~~L~~FRKSNLKPFE~~R~~DISTEIYQAGSTPCNGVEGFNC  
 YFPLQSYGFQPTNGVGYQPYRVVLSFELLHAPATVCGPKKSTNLVKNKCVNFNFNGLTGTGVLTESNKKFLPFQFG~~R~~DIADTTDAVRDPQT  
 LEILDITPCSF~~GG~~VSVITPGTNTSNQVAVLYQDVNCTEVPVAIHADQLTPTWRVYSTG~~S~~NVFTQTRAGCLIGAEHV~~N~~NSYEC~~D~~PIGAGICASYQTQ  
 TNSPRRARSVASQSIAYTMSLGAENSVAYS~~N~~NSIAIPTNFTISVTEILPVSM~~T~~KTSVDCTMYICGDSTEC~~S~~NLLQYGSFCTQLNRAL~~T~~GIAVEQ  
 DKNTQEVFAQVKQIYKTPPIKDFGGFNFSQILPDPSPKPSKRSFIEDLLFNKVTLADAGFIKQYGDCLG~~D~~IAARDLICAQKFNGLTVLPPLLTDE~~M~~IA  
 QYTSALLAGTITSGWTFGAGAALQIPFAMQMAYR~~F~~NGIGVTONVLYENQKLIANQFN~~S~~AI~~G~~KIQDLS~~S~~TASALGK~~L~~QDVVNQNAQALN~~T~~LKQL  
 S~~S~~NFGA~~I~~SSV~~L~~NDILS~~R~~LDKVEAEVQIDRLITGR~~L~~QSLQTYVTQQLIRAAEIRASANLAATK~~M~~SECVL~~G~~QSKRVDFCGKGYHLMSPQ~~S~~APHGVV  
 FLHVTVYPAQEK~~N~~FTTAPAICH~~D~~GKAHFPRE~~G~~VFVSN~~G~~THWFVTQRNFYEPQIIITDNTFVSGNCDV~~V~~IGIV~~N~~NTVYDPLQPELDSFKEELDKYF  
 KNHTSPDVLDGDISGINASVVNIQKEIDRLNEVAKNLES~~L~~IDLQELGKYEQYIKWPAHHHHHHHHHH

**B**

Theoretical N-glycopeptides of S protein digested using Glu-C

VNLTTRTQLPPAYTNSFTRGVVYYPDKVFRSSVLHSTQDLFLPFFSNVTFWHAIHVS~~GT~~NGTKRFDNPVLPFNDGVYFASTEKSNIIIRGWIFGTTL  
 DSKTQSL~~LIVN~~NATNVVIKVC~~E~~FQFCNDPFLGVYYHKNNKSWMESEFRVYSSANNCTFEYVSQPFLMDLE~~G~~KQGNFKNLREFVFKNIDGYFKI  
 YSKHTPINLVRDLPPQGFSAL~~E~~PLVDLPIGINITRFQTLALHRSYLT~~P~~GDSSSGWTAGAAAYVGYLQPRTFLLKYNE~~NG~~TITDAVDCALDPLSE~~T~~  
 KCTLKSFTVEKGIYQTSNFRVQPTESIVRFPNITNLCPFGEVFNATRFASVYAWNRKRISNCVADYSVLYNSASFSTFKCYGVSPTKLN~~DL~~CFTN  
 VYADSFVIRGDEV~~R~~QIAPGQTGKIADYNYKLPDDFTGCVIAWNSN~~LD~~SKVGGNYNYLYR~~L~~FRKSNLKPFE~~R~~DISTEIYQAGSTPCNGVEGFNC  
 YFPLQSYGFQPTNGVGYQPYRVVLSFELLHAPATVCGPKKSTNLVKNKCVNFNFNGLTGTGVLTESNKKFLPFQFG~~R~~DIADTTDAVRDPQT  
 LEILDITPCSF~~GG~~VSVITPGTNTSNQVAVLYQDVNCTEVPVAIHADQLTPTWRVYSTG~~S~~NVFTQTRAGCLIGAEHV~~N~~NSYEC~~D~~PIGAGICASYQTQ  
 TNSPRRARSVASQSIAYTMSLGAENSVAYS~~N~~NSIAIPTNFTISVTEILPVSM~~T~~KTSVDCTMYICGDSTEC~~S~~NLLQYGSFCTQLNRAL~~T~~GIAVEQ  
 DKNTQEVFAQVKQIYKTPPIKDFGGFNFSQILPDPSPKPSKRSFIEDLLFNKVTLADAGFIKQYGDCLG~~D~~IAARDLICAQKFNGLTVLPPLLTDE~~M~~IA  
 QYTSALLAGTITSGWTFGAGAALQIPFAMQMAYR~~F~~NGIGVTONVLYENQKLIANQFN~~S~~AI~~G~~KIQDLS~~S~~TASALGK~~L~~QDVVNQNAQALN~~T~~LKQL  
 S~~S~~NFGA~~I~~SSV~~L~~NDILS~~R~~LDKVEAEVQIDRLITGR~~L~~QSLQTYVTQQLIRAAEIRASANLAATK~~M~~SECVL~~G~~QSKRVDFCGKGYHLMSPQ~~S~~APHGVV  
 FLHVTVYPAQEK~~N~~FTTAPAICH~~D~~GKAHFPRE~~G~~VFVSN~~G~~THWFVTQRNFYEPQIIITDNTFVSGNCDV~~V~~IGIV~~N~~NTVYDPLQPELDSFKEELDKYF  
 KNHTSPDVLDGDISGINASVVNIQKEIDRLNEVAKNLES~~L~~IDLQELGKYEQYIKWPAHHHHHHHHHH

**C**

Theoretical N-glycopeptides of S protein digested using trypsin and Glu-C

VNLTTRTQLPPAYTNSFTRGVVYYPDKVFRSSVLHSTQDLFLPFFSNVTFWHAIHVS~~GT~~NGTKRFDNPVLPFNDGVYFASTEKSNIIIRGWIFGTTL  
 DSKTQSL~~LIVN~~NATNVVIKVC~~E~~FQFCNDPFLGVYYHKNNKSWMESEFRVYSSANNCTFEYVSQPFLMDLE~~G~~KQGNFKNLREFVFKNIDGYFKI  
 YSKHTPINLVRDLPPQGFSAL~~E~~PLVDLPIGINITRFQTLALHRSYLT~~P~~GDSSSGWTAGAAAYVGYLQPRTFLLKYNE~~NG~~TITDAVDCALDPLSE~~T~~  
 KCTLKSFTVEKGIYQTSNFRVQPTESIVRFPNITNLCPFGEVFNATRFASVYAWNRKRISNCVADYSVLYNSASFSTFKCYGVSPTKLN~~DL~~CFTN  
 VYADSFVIRGDEV~~R~~QIAPGQTGKIADYNYKLPDDFTGCVIAWNSN~~LD~~SKVGGNYNYLYR~~L~~FRKSNLKPFE~~R~~DISTEIYQAGSTPCNGVEGFNC  
 CYFPLQSYGFQPTNGVGYQPYRVVLSFELLHAPATVCGPKKSTNLVKNKCVNFNFNGLTGTGVLTESNKKFLPFQFG~~R~~DIADTTDAVRDPQT  
 TLEILDITPCSF~~GG~~VSVITPGTNTSNQVAVLYQDVNCTEVPVAIHADQLTPTWRVYSTG~~S~~NVFTQTRAGCLIGAEHV~~N~~NSYEC~~D~~PIGAGICASYQ  
 TQ~~T~~NSPRRARSVASQSIAYTMSLGAENSVAYS~~N~~NSIAIPTNFTISVTEILPVSM~~T~~KTSVDCTMYICGDSTEC~~S~~NLLQYGSFCTQLNRAL~~T~~GIAVEQ  
 EQDKNTQEVFAQVKQIYKTPPIKDFGGFNFSQILPDPSPKPSKRSFIEDLLFNKVTLADAGFIKQYGDCLG~~D~~IAARDLICAQKFNGLTVLPPLLTDE  
 MIAQYTSALLAGTITSGWTFGAGAALQIPFAMQMAYR~~F~~NGIGVTONVLYENQKLIANQFN~~S~~AI~~G~~KIQDLS~~S~~TASALGK~~L~~QDVVNQNAQALN~~T~~LKQL  
 S~~S~~NFGA~~I~~SSV~~L~~NDILS~~R~~LDKVEAEVQIDRLITGR~~L~~QSLQTYVTQQLIRAAEIRASANLAATK~~M~~SECVL~~G~~QSKRVDFCGKGYHLMSPQ~~S~~APHGVV  
 FLHVTVYPAQEK~~N~~FTTAPAICH~~D~~GKAHFPRE~~G~~VFVSN~~G~~THWFVTQRNFYEPQIIITDNTFVSGNCDV~~V~~IGIV~~N~~NTVYDPLQPELDSFKEELDKYF  
 KNHTSPDVLDGDISGINASVVNIQKEIDRLNEVAKNLES~~L~~IDLQELGKYEQYIKWPAHHHHHHHHHH











**Supplementary Figure S6.** Comparison of the N-glycosites on the SARS-CoV-2 and SARS-CoV spike proteins.

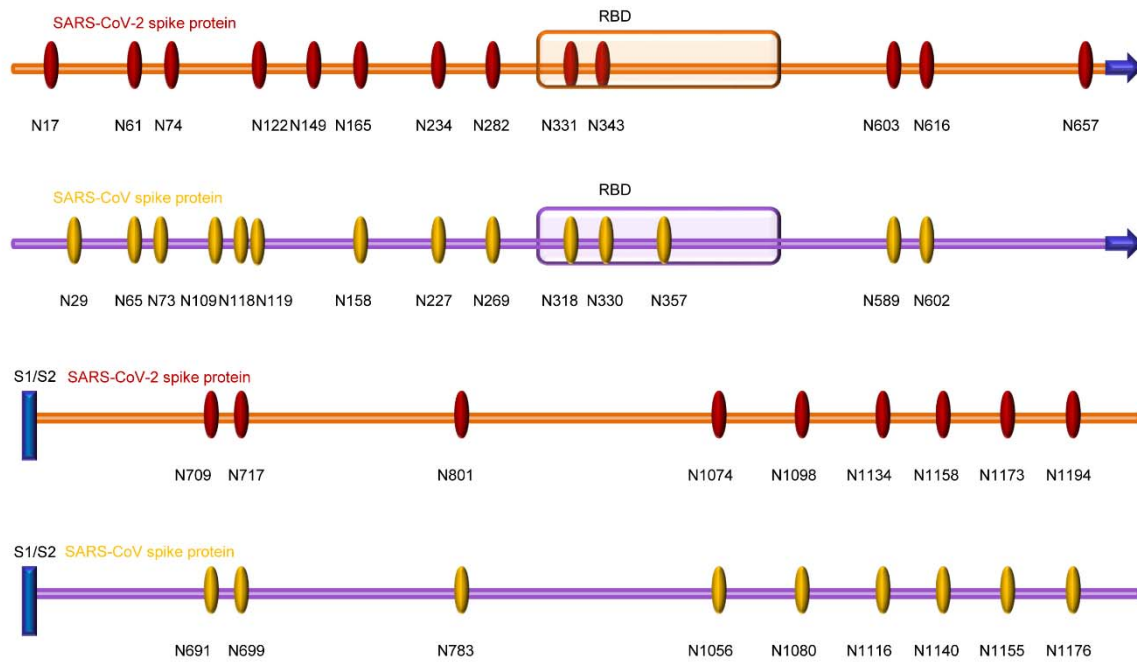

Supplementary Figure S7. Representative and high-quality spectra of intact N-glycopeptides and deglycosylated peptides.

**Spectra of intact N-glycopeptides from recombinant SARS-CoV-2 spike proteins expressed in insect cells**

N17

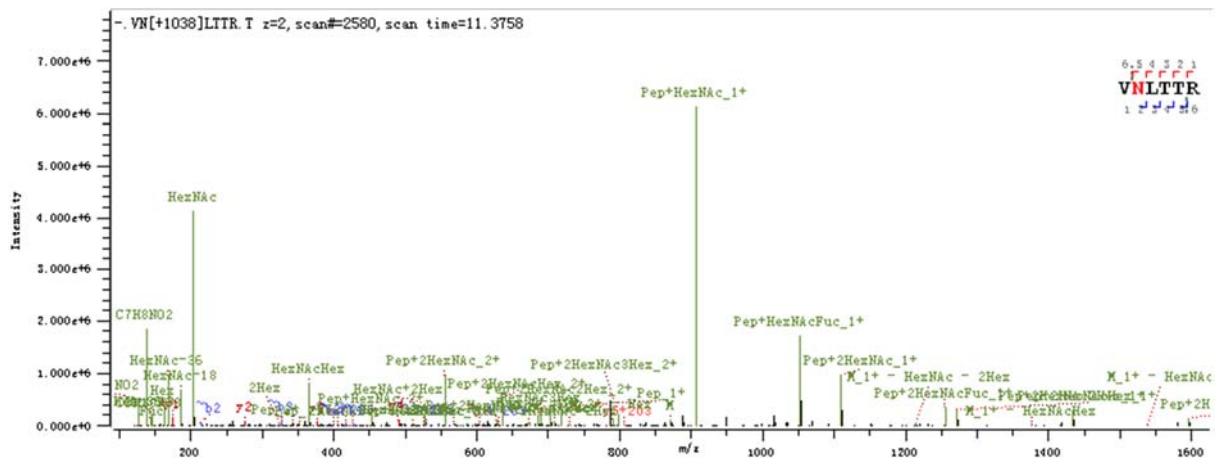

N61 & N74

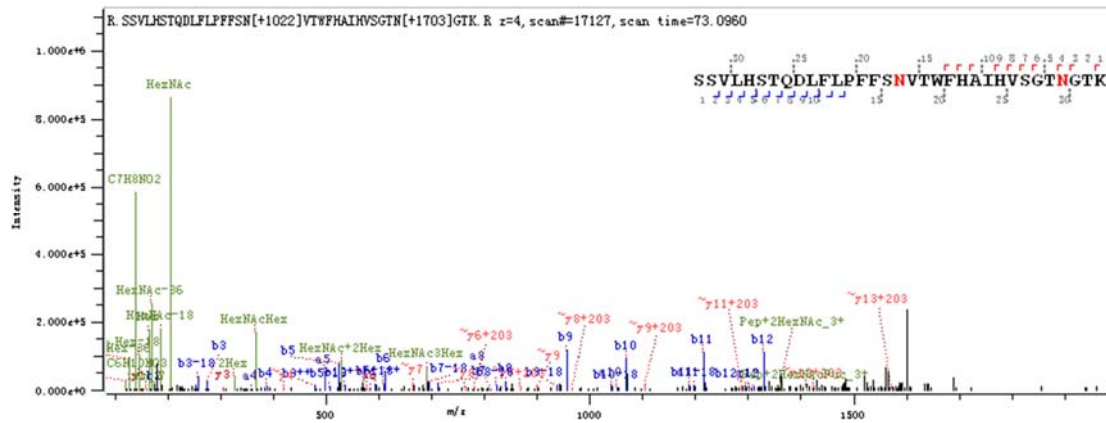

N122

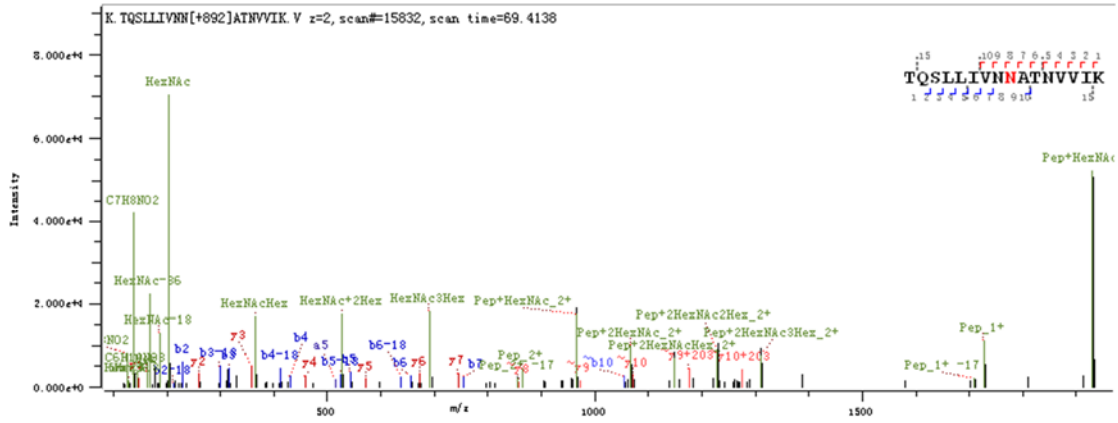

N149

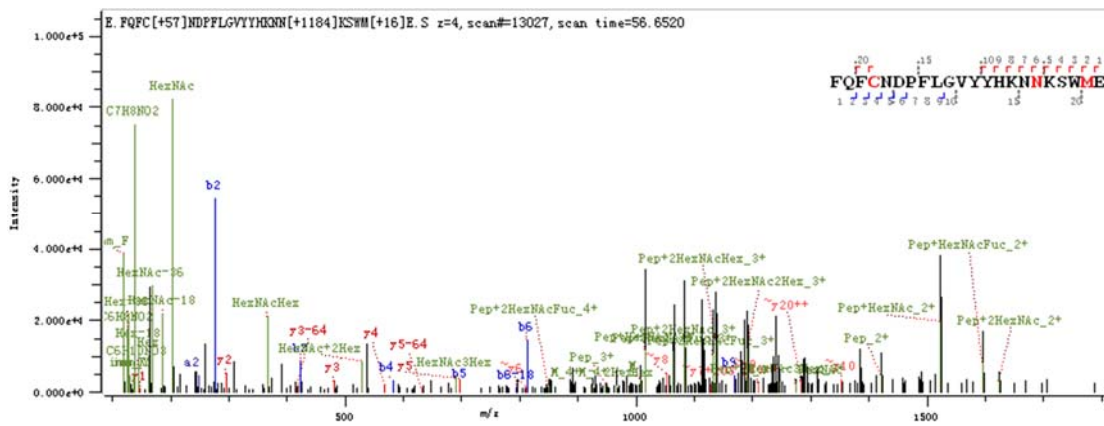

N165

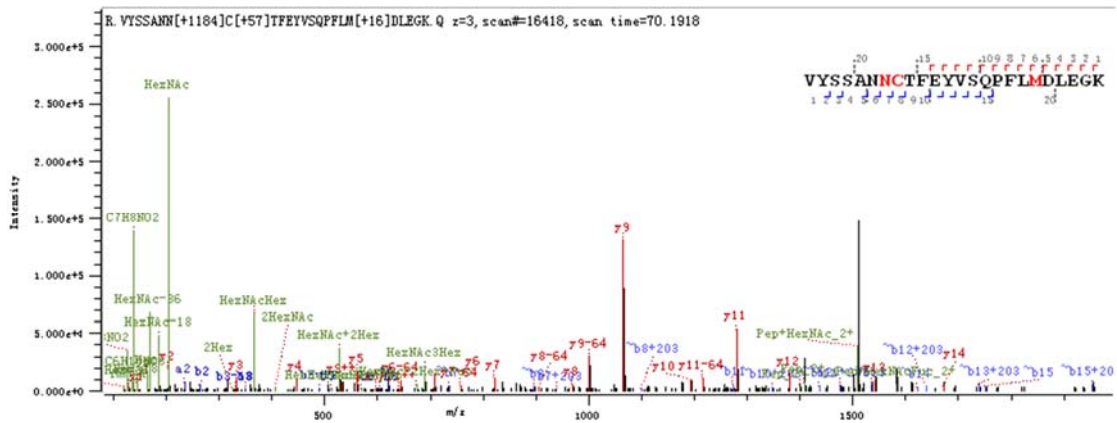

N234



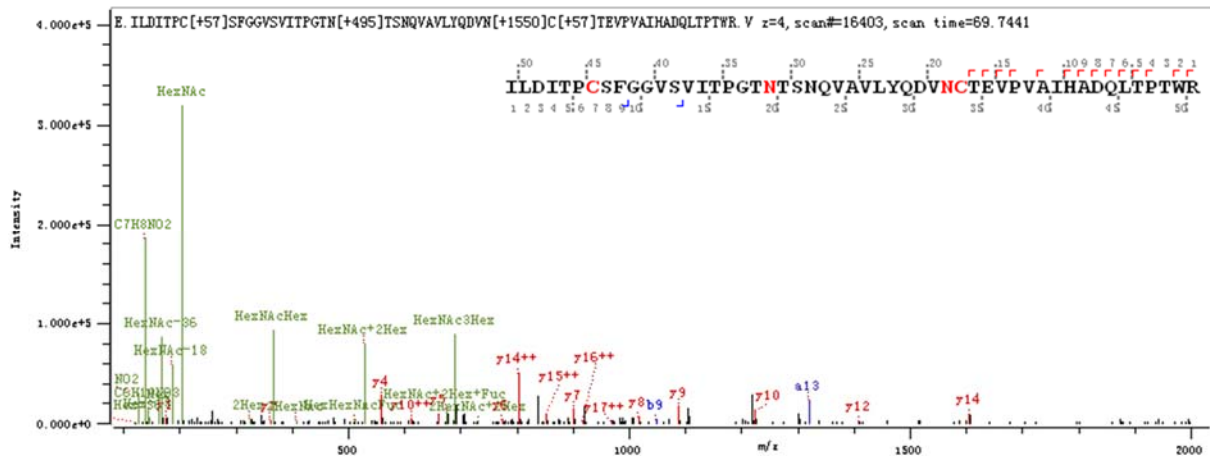

### N657

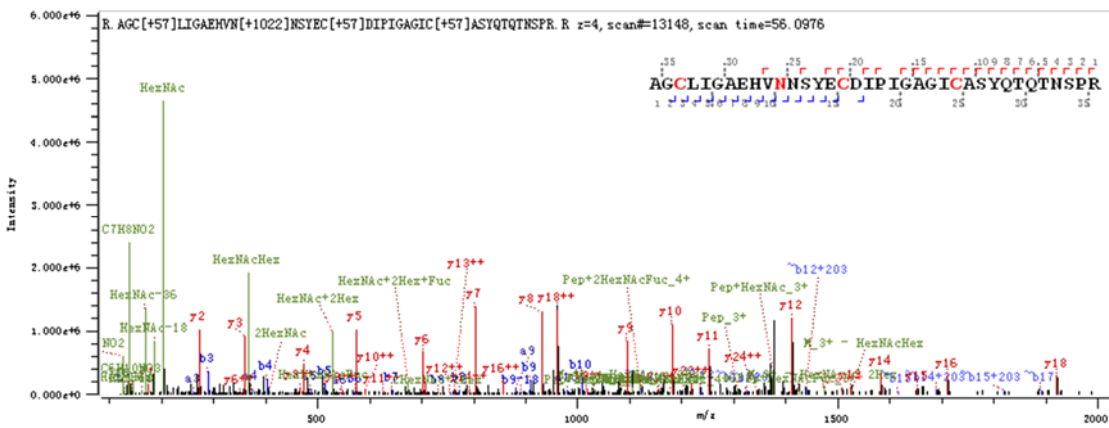

### N709 & N717

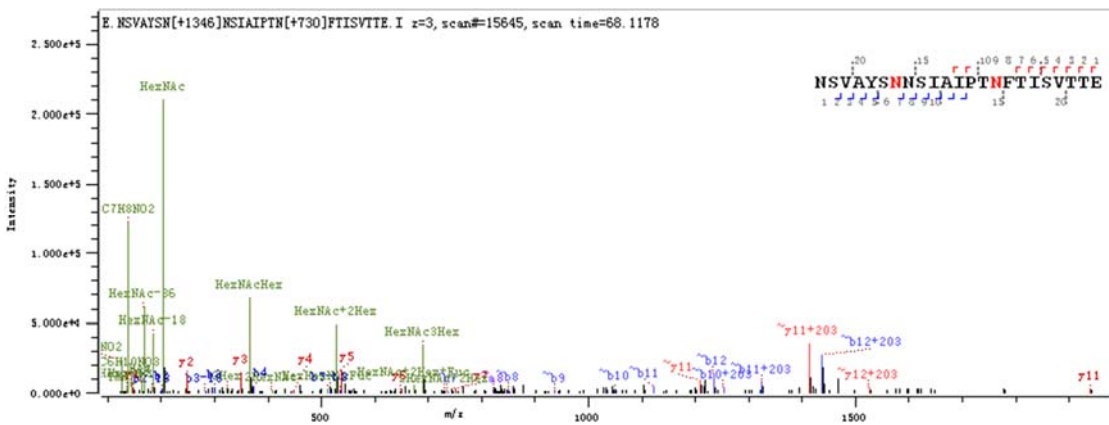

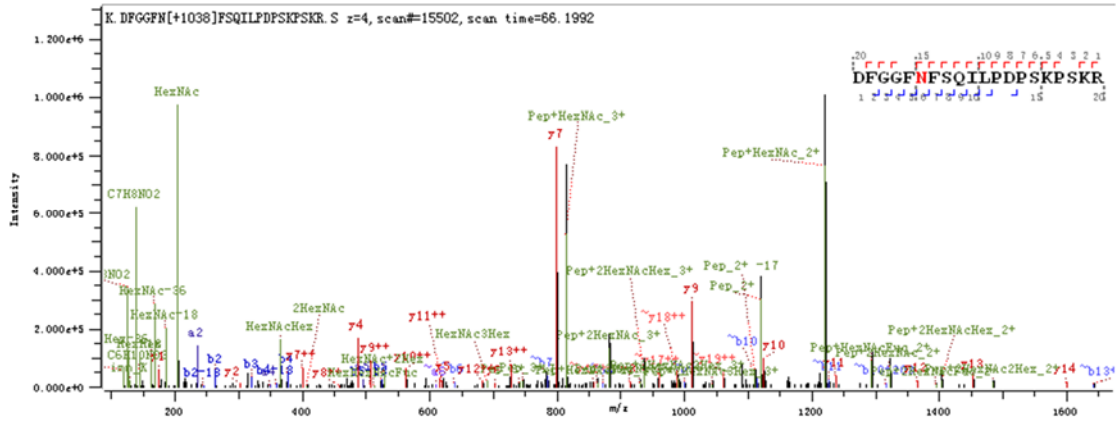

N1074

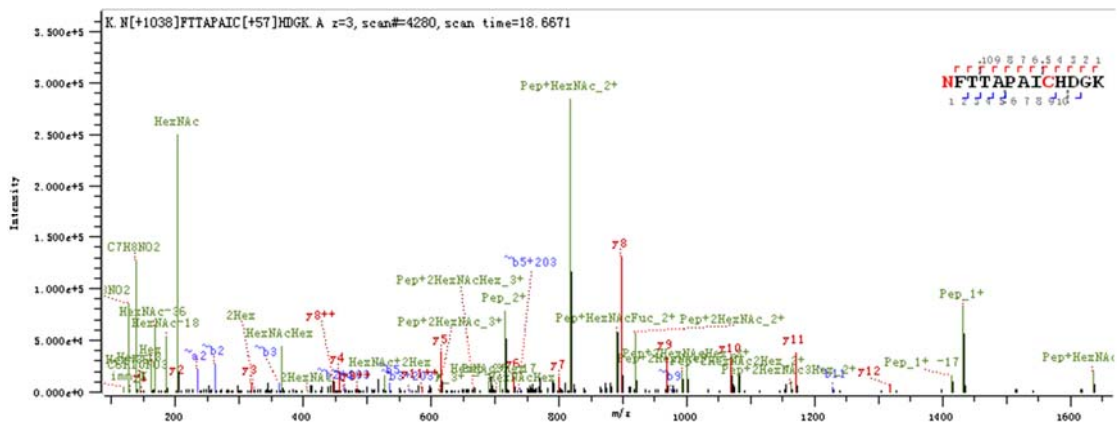

N1098

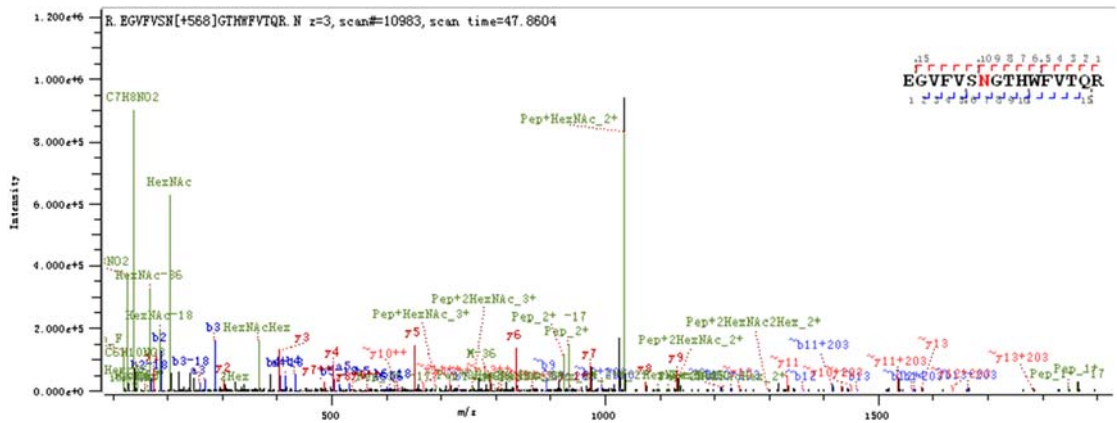

N1158 & N1173

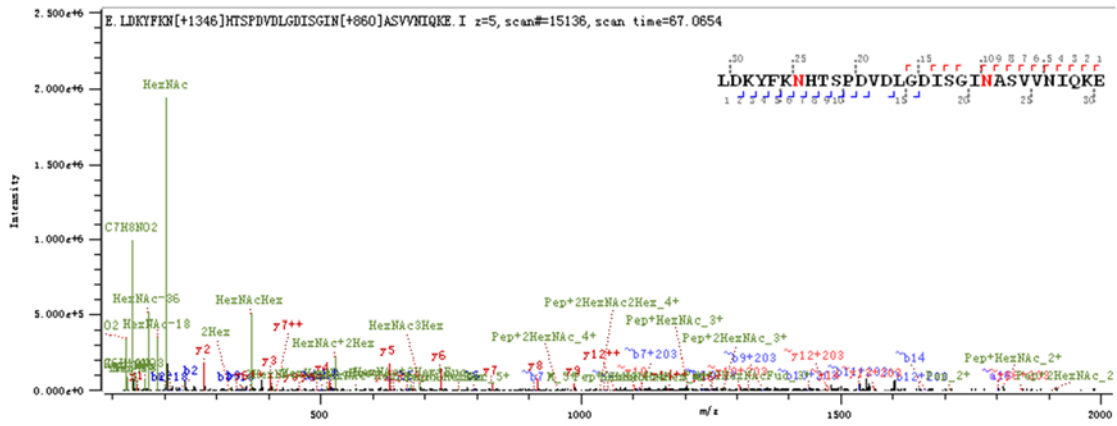

N1194

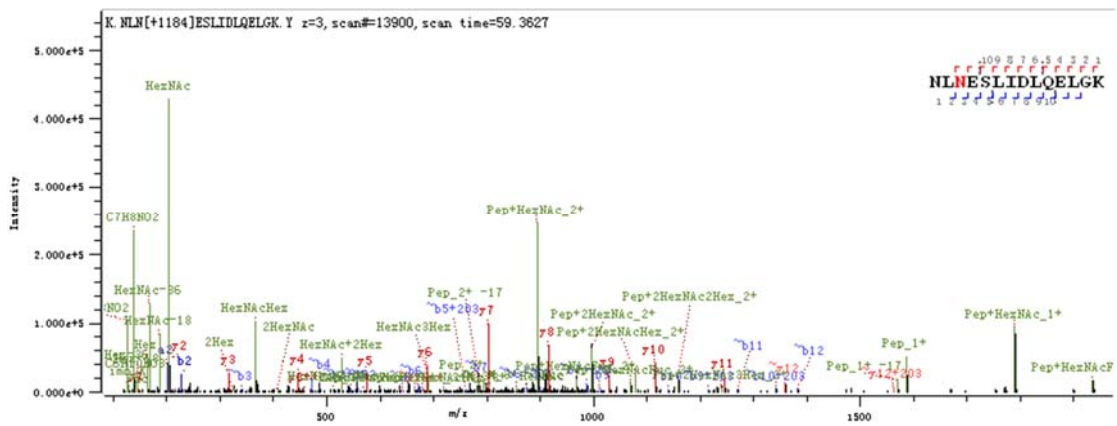

**Spectra of deglycosylated peptides from recombinant SARS-CoV-2 spike proteins expressed in insect cells**

N17

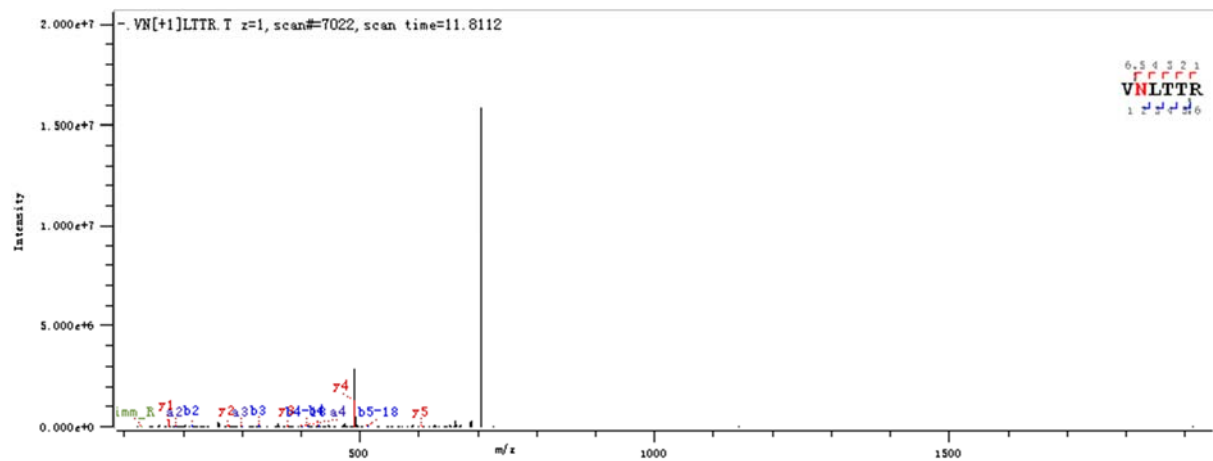

N122





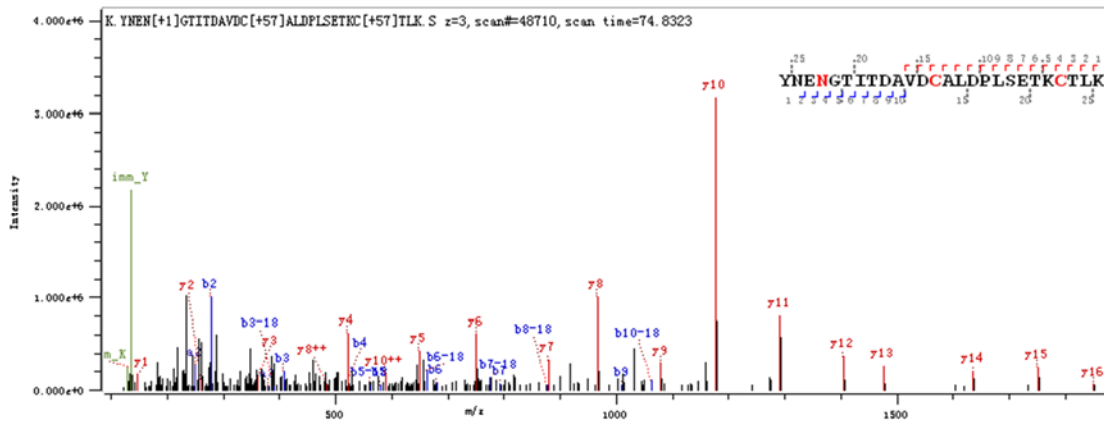

N331

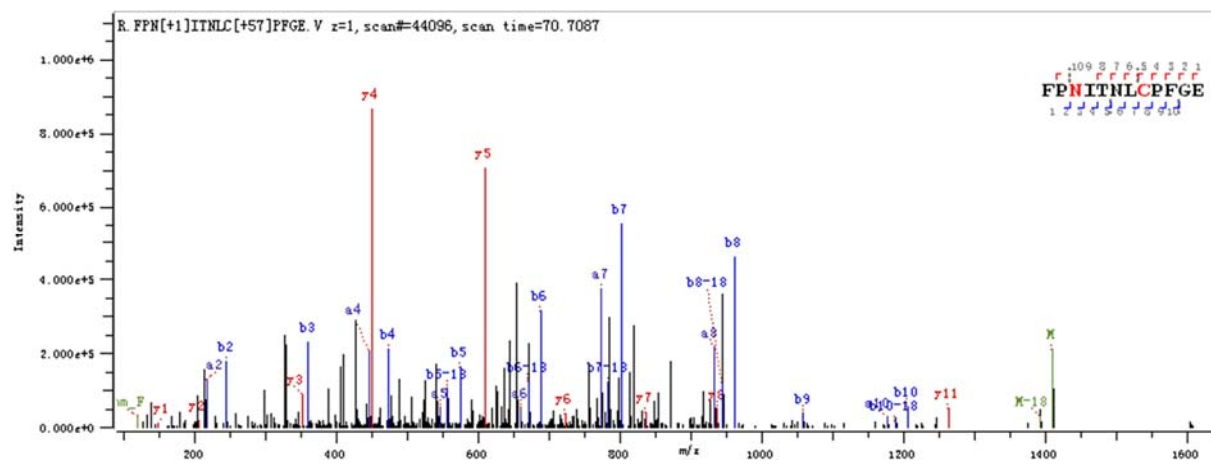

N343

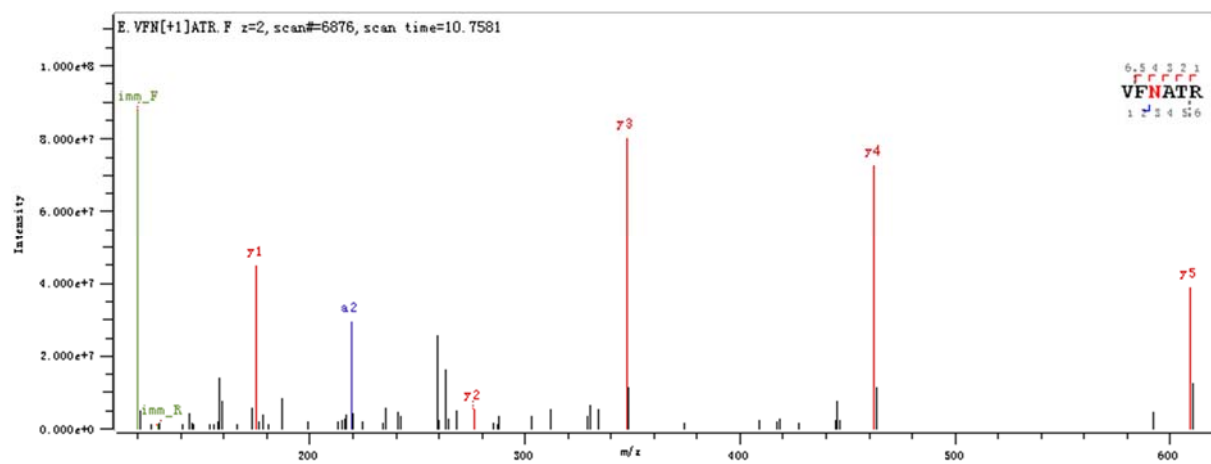

N657

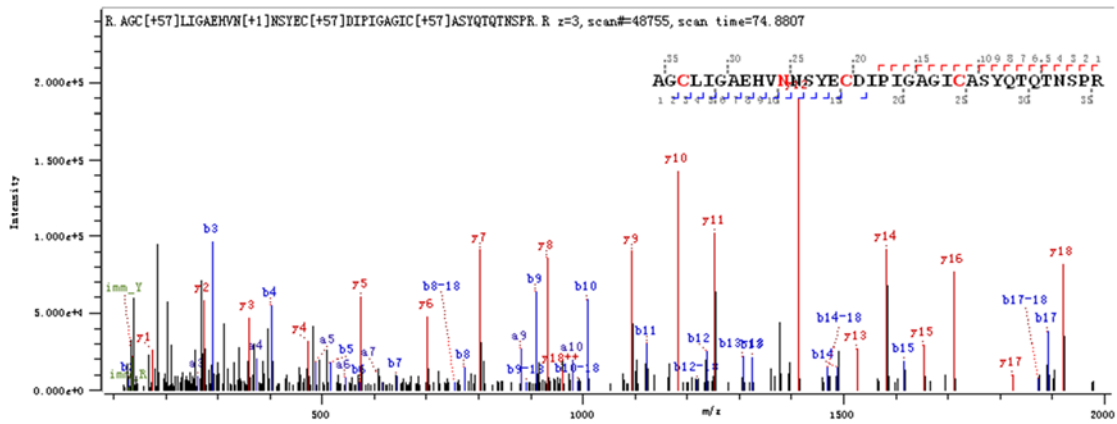

N709

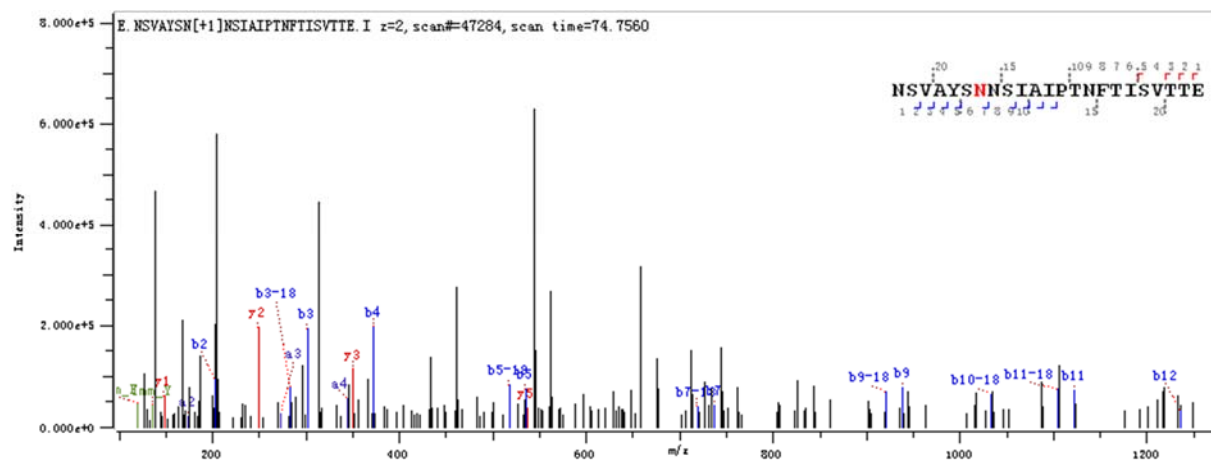

N801

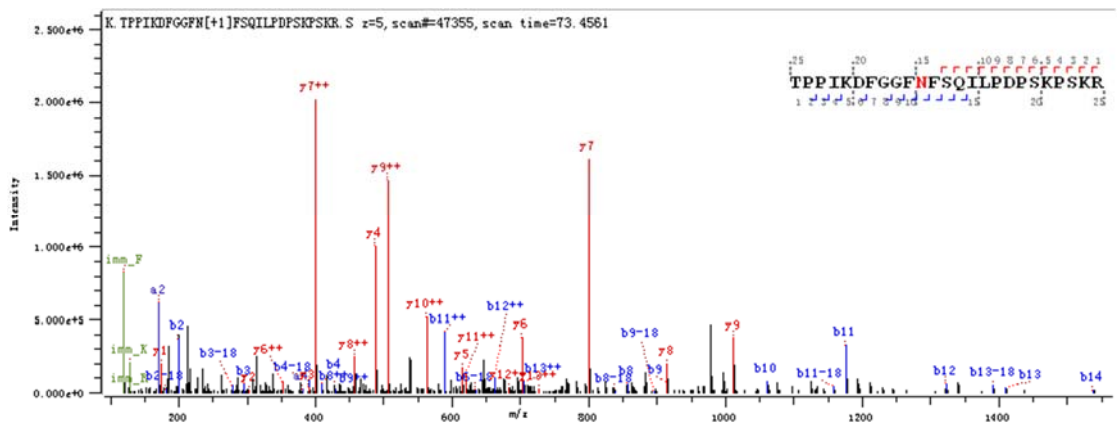

N1074











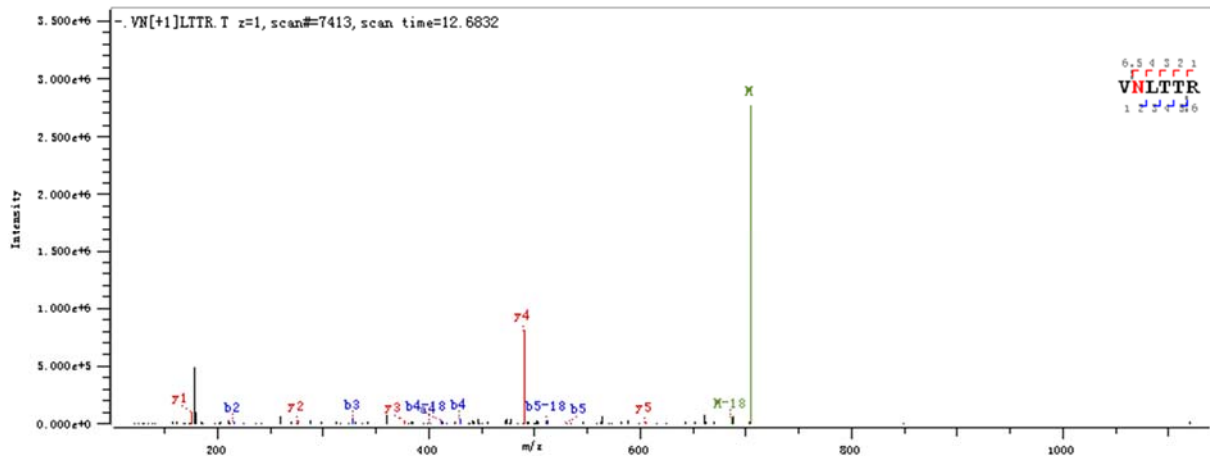

N122

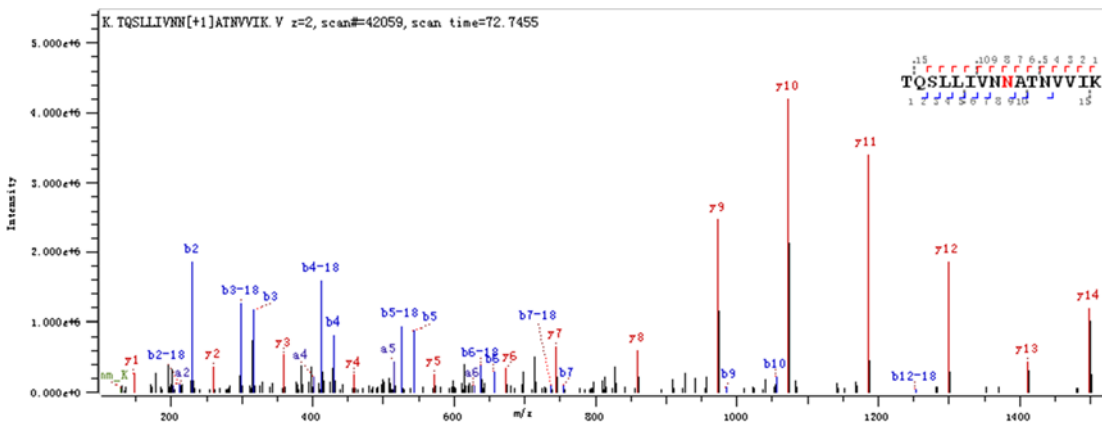

N149

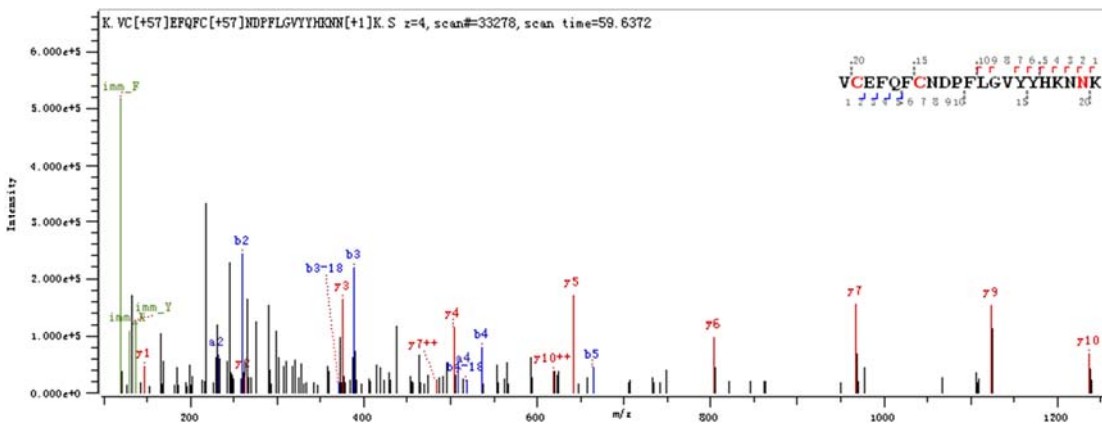

N165



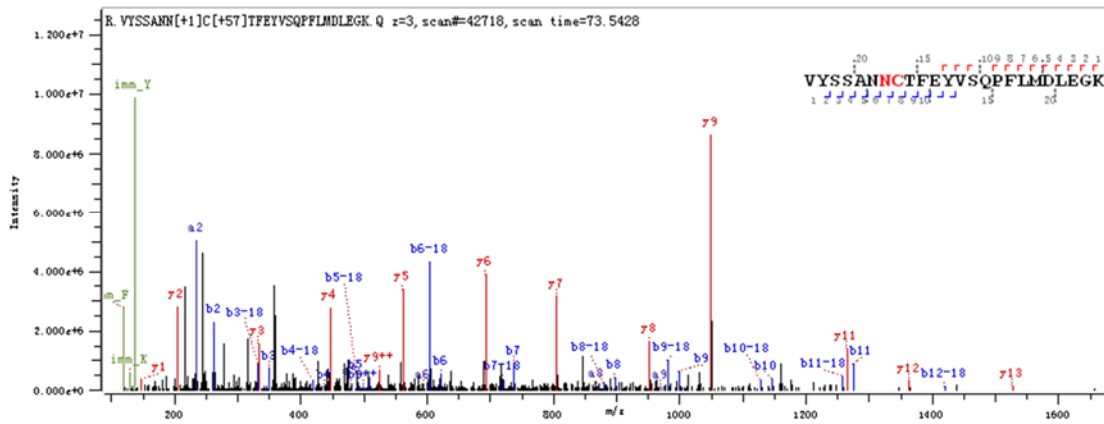

N234

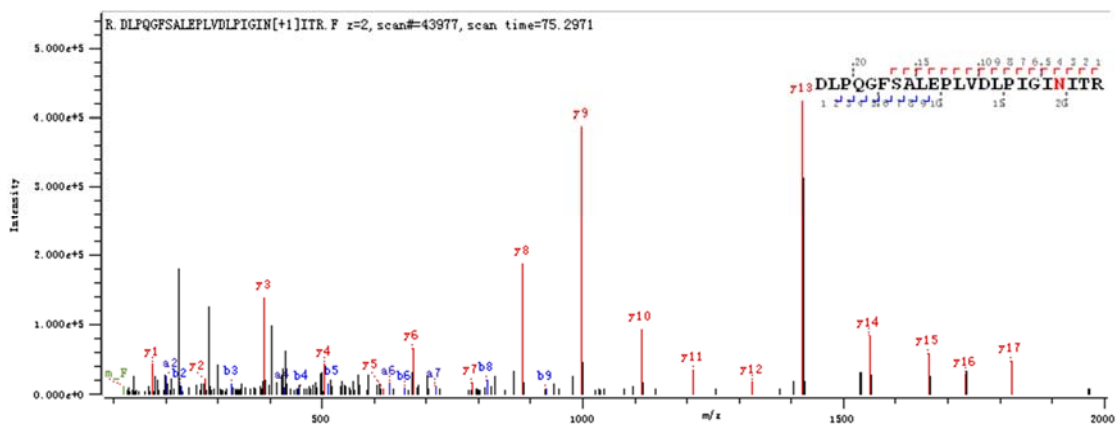

N282

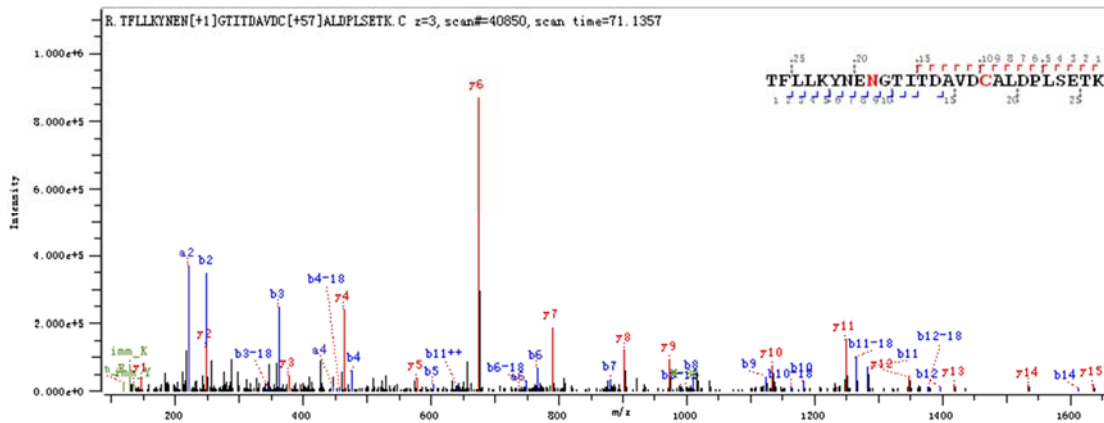

N331

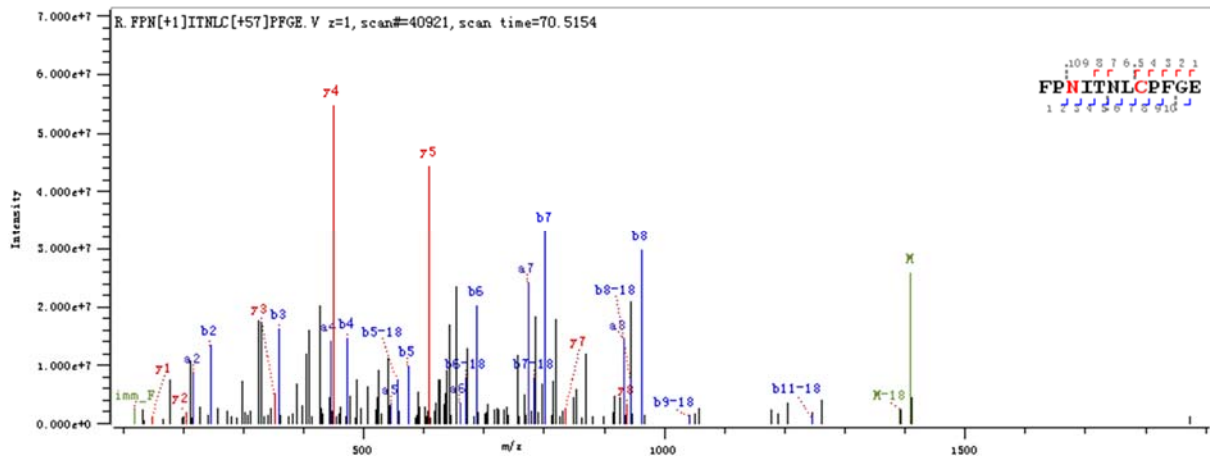

N343

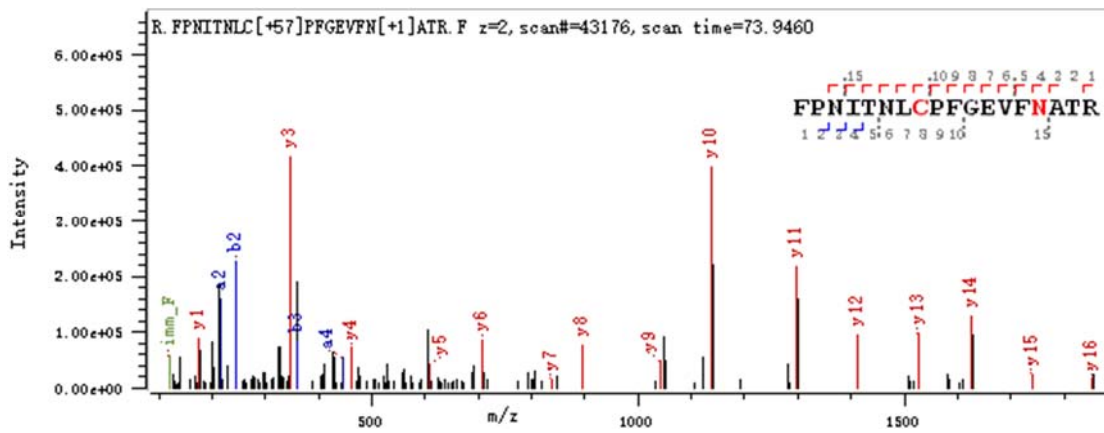

N603

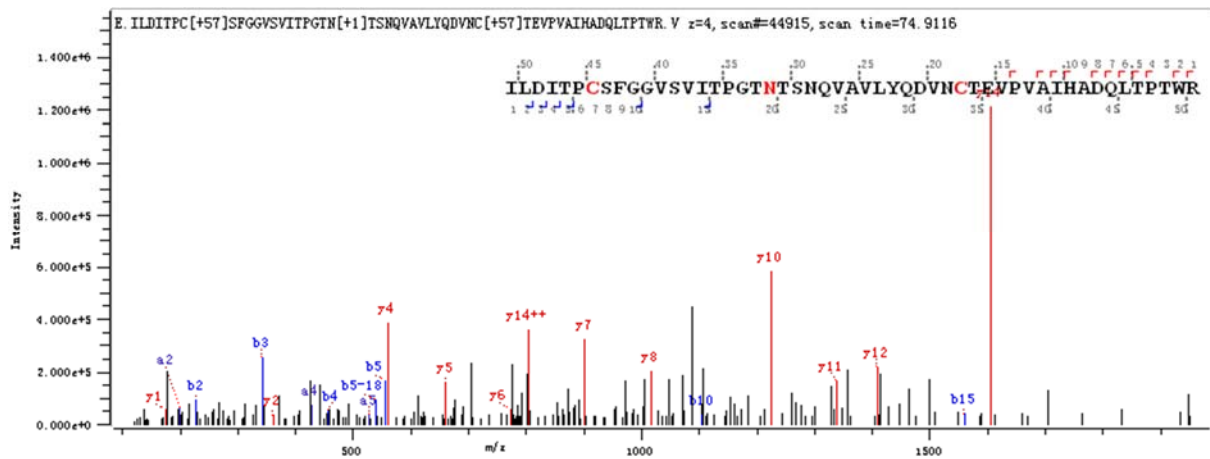

N657

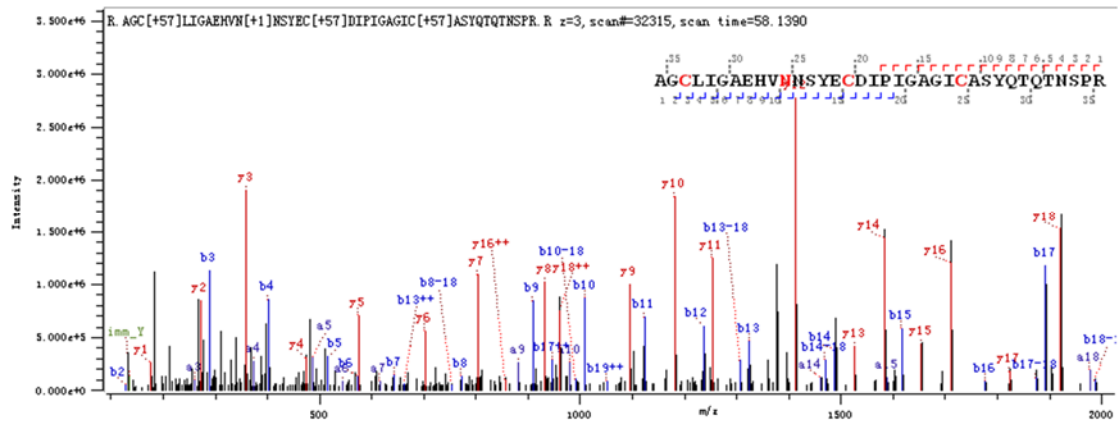

**Supplementary Figure S8.** Quantitative analysis of site-specific N-glycosylation of S protein expressed in insect cells (top 5 N-glycans).

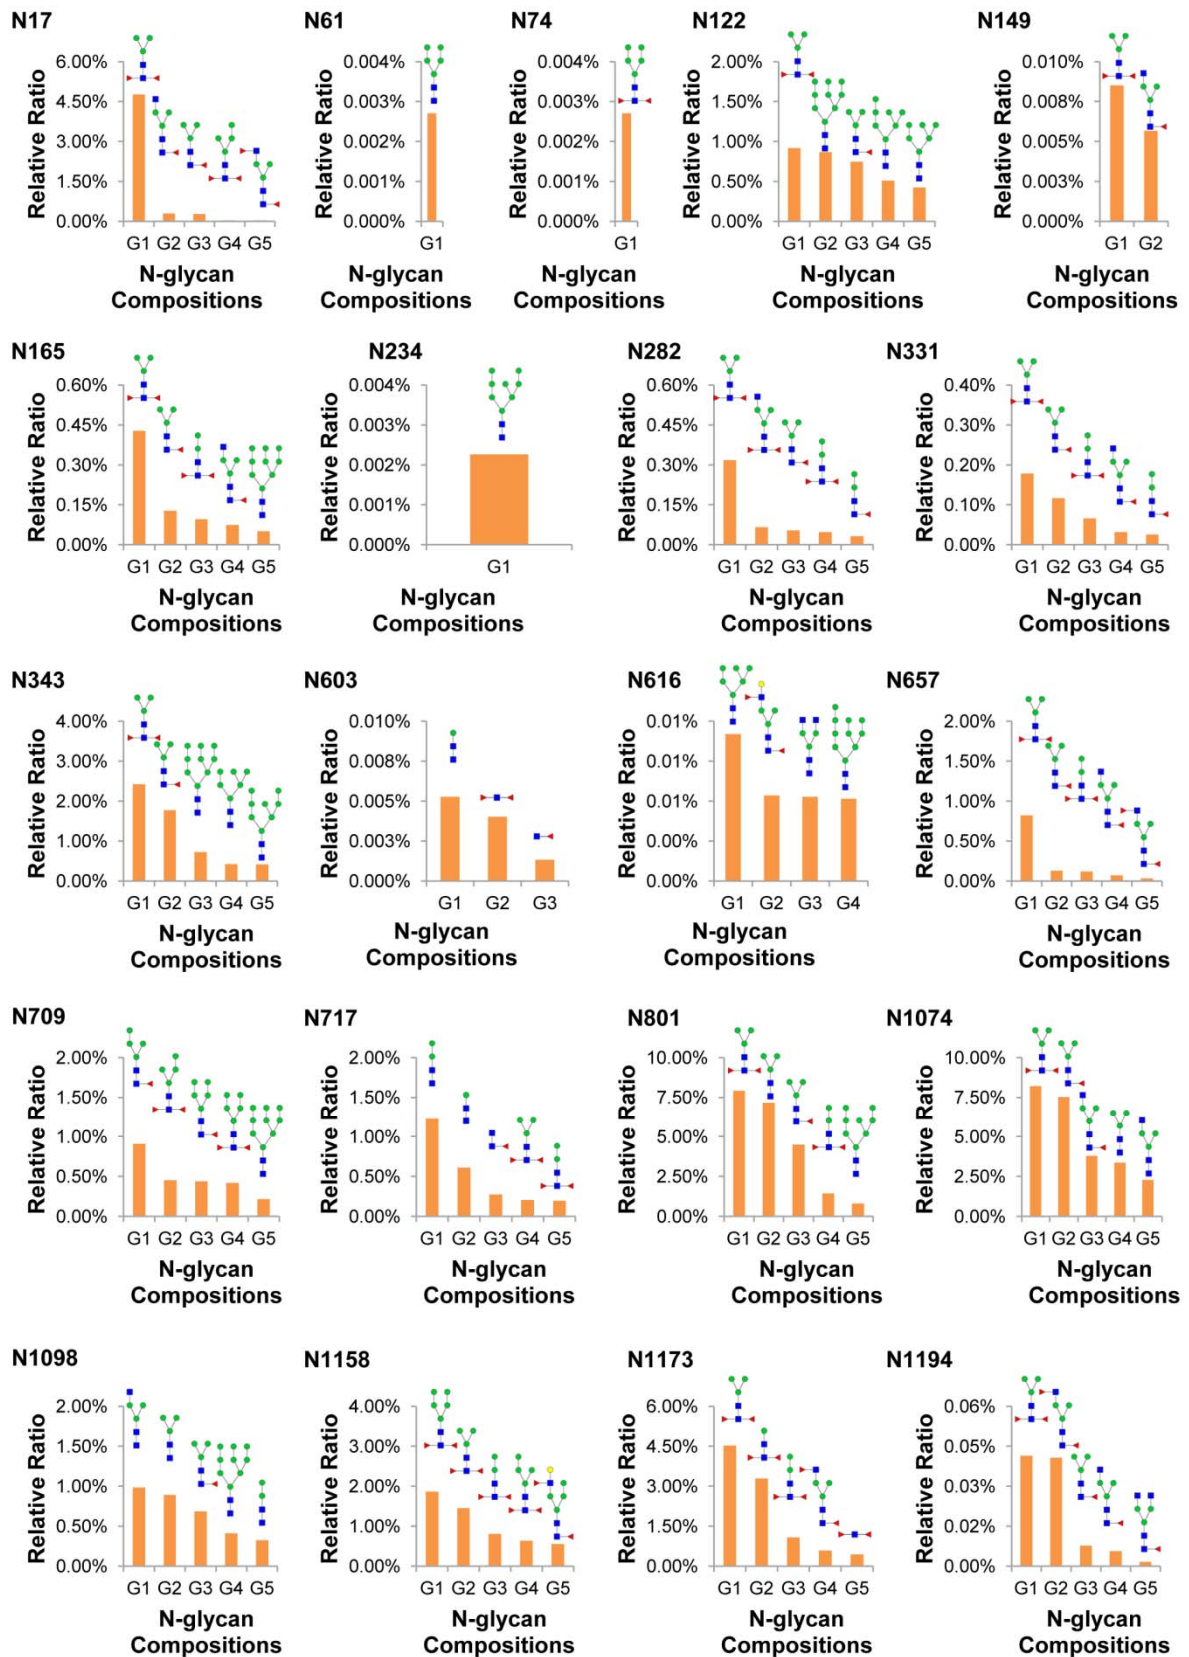

**Supplementary Figure S9.** Quantitative analysis of site-specific N-glycosylation of S protein expressed in human cells (top 5 N-glycans).

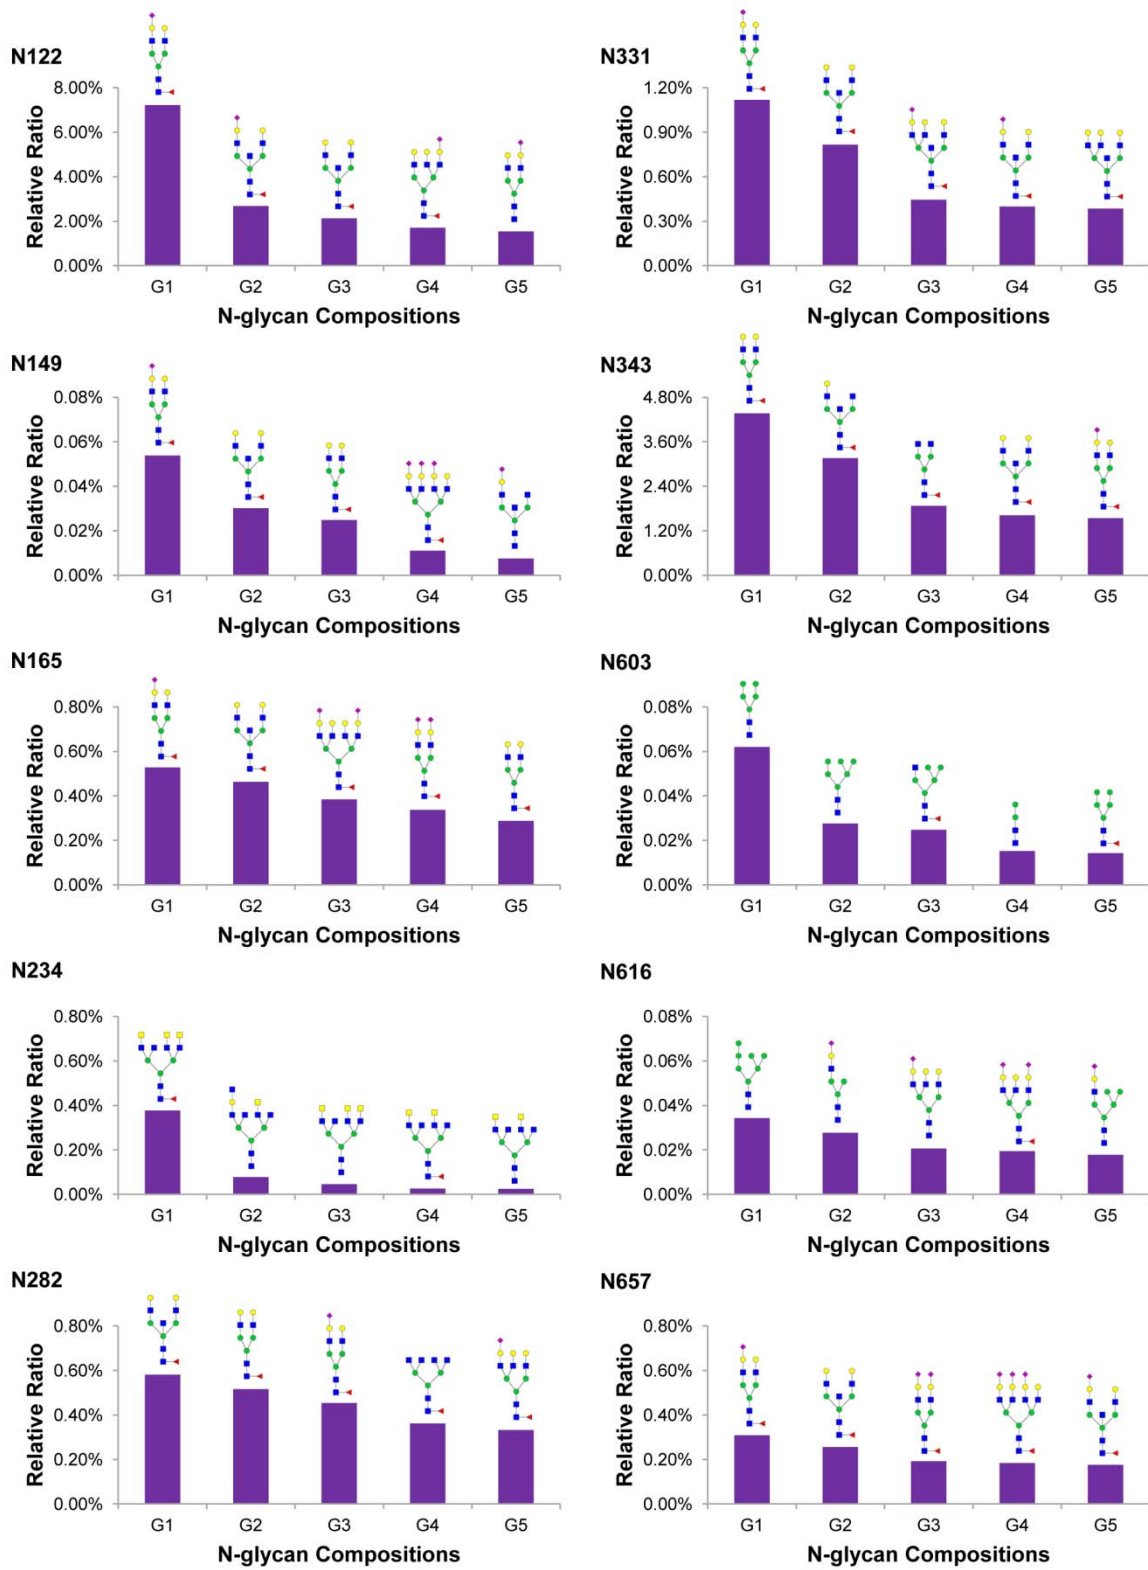



**Supplementary Figure S11.** SDS-PAGE analysis of RBDs expressed in insect and human cells.

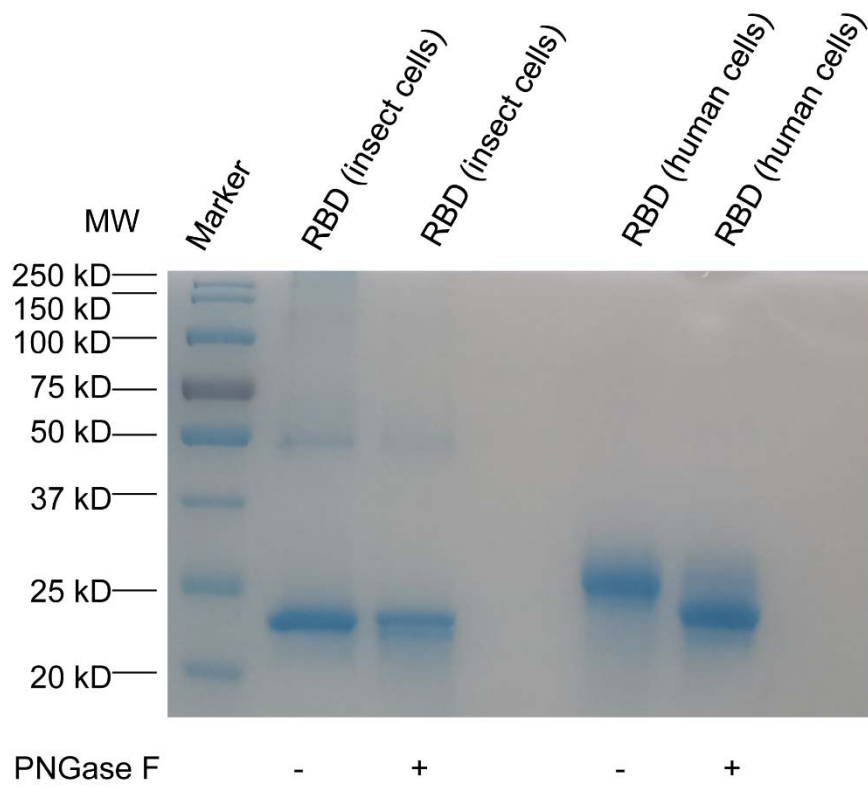

Supplement: mmc1.pdf [file mmc1.pdf]
